# Supplementary material
Source: publisher site journal article supplement (https://www.dovepress.com/get_supplementary_file.php?f=295498.docx)
Supplement: Supplementary file 1 [file get_supplementary_file.php]

**Appendix A: Interview questions**

- Demographic questions: age, gender, location and setting or residence (i.e., rural, suburban, etc.), formal education, family system, length of time lived in Alaska, type of lung cancer, family history of cancer
- What first prompted you to seek help?
- What made you suspect something was wrong?
- What was the first symptom you noticed? At what point, if at all, did this impact your ability to participate in everyday life?
- How did the process unfold from your first recognition of a symptom to your diagnosis?
- What was the process of observation of your symptoms to receiving a diagnosis?
- How did your symptoms impact your daily life?
- How did you explain these symptoms to your healthcare provider?
- What do you feel your provider’s response was to your complaints?
- Did anyone encourage you to go to a physician?
- What concerns did you have about the possibility of being diagnosed?
- Could you tell that you did not feel “normal”?
- What physical and mental signs did you notice?
- Were there any signs/symptoms that you felt, when looking back after receiving your diagnosis, may have been due to the cancer?
- Were you ever told about the possibility of lung cancer and the symptoms to be aware of?
- Were there any things in particular you were not able to do anymore, like maintain work routines, clean the house, or care for yourself?
- Did any symptoms exist that you did not tell your provider about?
- Did you receive any screening for lung cancer?
- Is there anything you can think of that we didn’t cover that is important to know?
